# Supplementary material for: Evaluation of the strategy for implementing the GLA:D programme in Switzerland: protocol for an implementation-effectiveness hybrid type 3 design study with a mixed-method approach
Source: HighWire-hosted journal article supplement (doi:10.1136/bmjopen-2021-057993), 2022-06-01
Supplement: bmjopen-2021-057993supp001_data_supplement.pdf [file bmjopen-2021-057993supp001_data_supplement.pdf]

## Supplement I: Matrix of the influences on the implementation outcomes

|                                                                                   | Acceptability | Appropriateness | Feasibility | Adoption | Fidelity | Penetration | Sustainability |
|-----------------------------------------------------------------------------------|---------------|-----------------|-------------|----------|----------|-------------|----------------|
| <b>Determinants</b>                                                               |               |                 |             |          |          |             |                |
| Guidelines support this EBI explicitly                                            | X             | X               |             |          |          |             |                |
| EBI proven effectiveness and long-term effect                                     | X             | X               |             |          |          |             |                |
| Underuse; perceived usefulness                                                    | X             | X               |             |          |          |             |                |
| Content individualized/tailored to patients' needs, but core structure            | X             | X               | X           |          |          |             |                |
| PTs: database, assessments and given structures                                   | X             | X               | X           |          | X        |             |                |
| Certified PTs can access all material (website)                                   | X             | X               | X           |          | X        |             |                |
| Courses and material costs for PTs; patients' costs covered by insurance          | X             | X               | X           |          |          |             |                |
| Endorsement of PT societies                                                       | X             |                 |             |          |          |             |                |
| Learning climate, tangible fit                                                    | X             |                 |             |          |          |             |                |
| Leadership engagement, available resources, access to knowledge                   | X             |                 |             |          |          |             |                |
| Demand from patients, sometimes missing willingness to exercise and being active  | X             | X               |             |          |          |             |                |
| Coordination in 3 language areas by Universities of Applied Sciences              | X             |                 |             |          |          |             |                |
| Informed patients, transparency of EBI                                            | X             | X               |             |          | X        |             |                |
| Professional autonomy/MDs: limited time for patient education                     | X             |                 |             |          |          |             |                |
| MDs: possibility to refer to an EBI; transparency: they know what they will get   | X             | X               |             |          |          |             |                |
| PTs: skills; structured plan for treatment with the possibility to individualize  | X             | x               |             |          | x        |             |                |
| <b>Implementation Strategies</b>                                                  |               |                 |             |          |          |             |                |
| Formation of IG GLA:D                                                             |               |                 |             |          | X        |             |                |
| Dissemination of programme information to raise awareness (window of opportunity) | X             | x               |             | X        |          | X           |                |
| Endorsement by MD and PT societies for programme                                  | X             | x               |             | X        |          |             | X              |
| Utilize financial strategies                                                      | X             | x               |             | X        |          | X           | X              |

|                                                                                              |   |  |  |   |   |   |   |
|----------------------------------------------------------------------------------------------|---|--|--|---|---|---|---|
| Programme stays within usual covered PT sessions                                             |   |  |  |   |   |   |   |
| Establishment of database (clinical outcomes, patient reports): data monitoring and feedback |   |  |  |   | X |   | X |
| Training: Certification of PTs (course material, access to database)                         | X |  |  | X | X | X |   |
| Quality improvement (evaluation first courses)                                               | X |  |  | X | X | X |   |
| Clinician reminders (availability of programme – referral)                                   | X |  |  | X |   |   | X |
| (Inter)National strategies: NCD strategies (WHO, Health 2030, SLR)                           | X |  |  | X | x | X | X |
| <b>Mechanism</b>                                                                             | x |  |  | x | x | X |   |
